# Supplementary material for: Nitrogen-doped porous graphene–activated carbon composite derived from “bucky gels” for supercapacitors
Source: Royal Society of Chemistry journal article supplement (doi:10.1039/c4ra13724h), 2015-01-01
Supplement: c4ra13724h1.pdf [file c4ra13724h1.pdf]

## **Supplementary Information for**

# **Nitrogen-doped porous graphene/activated carbon composite derived from “bucky gels” for supercapacitors**

Chao Zheng, Xufeng Zhou<sup>\*</sup>, Hailiang Cao, Guohua Wang and Zhaoping Liu<sup>\*</sup>

*Ningbo Institute of Materials Technology and Engineering, Chinese Academy of  
Sciences, Ningbo, Zhejiang 315201, P. R. China*

*Corresponding author: [Liuzp@nimte.ac.cn](mailto:Liuzp@nimte.ac.cn), [Zhouxf@nimte.ac.cn](mailto:Zhouxf@nimte.ac.cn)*

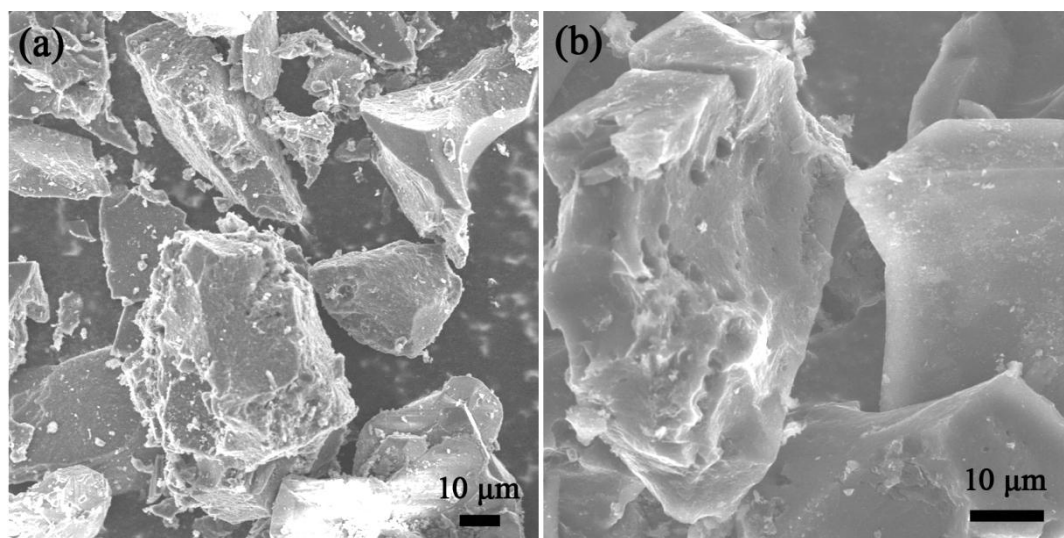

**Fig. S1** SEM images of (a) intermediate product of AC derived from pure ILs and (b) porous AC

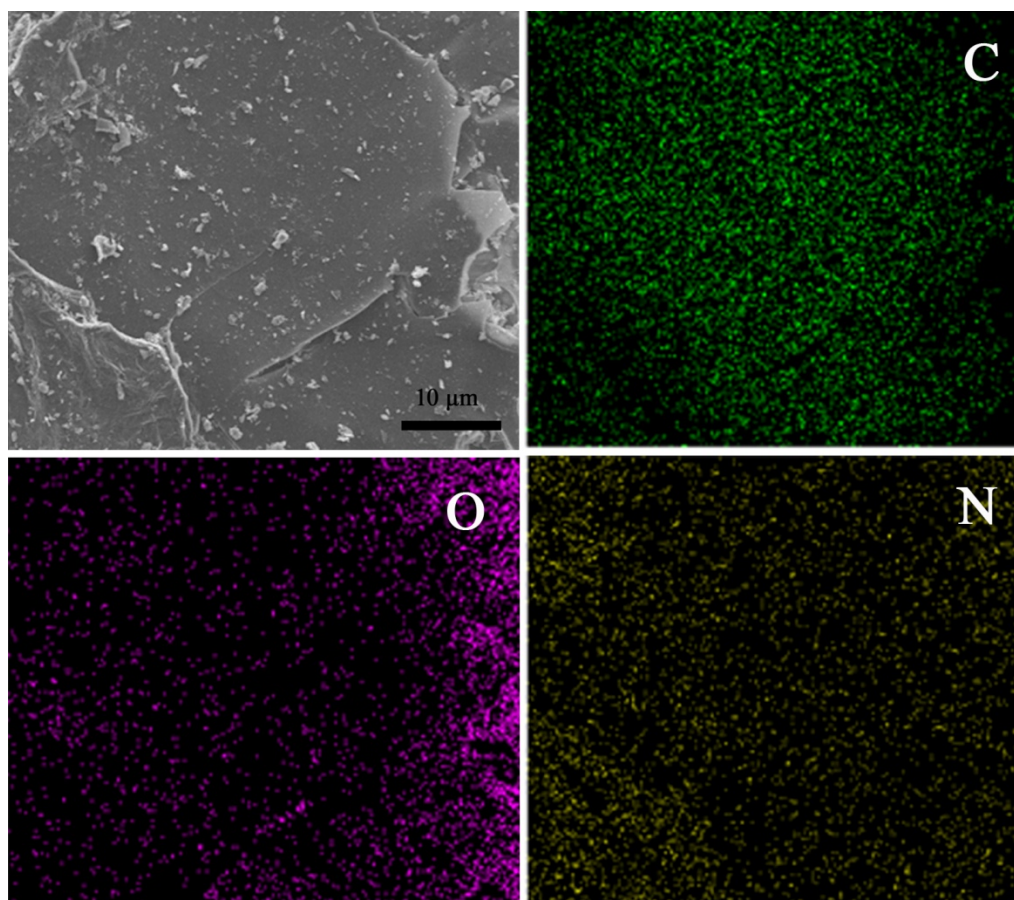

**Fig. S2** EDS mapping image of intermediate product derived from graphene-based “bucky gels”

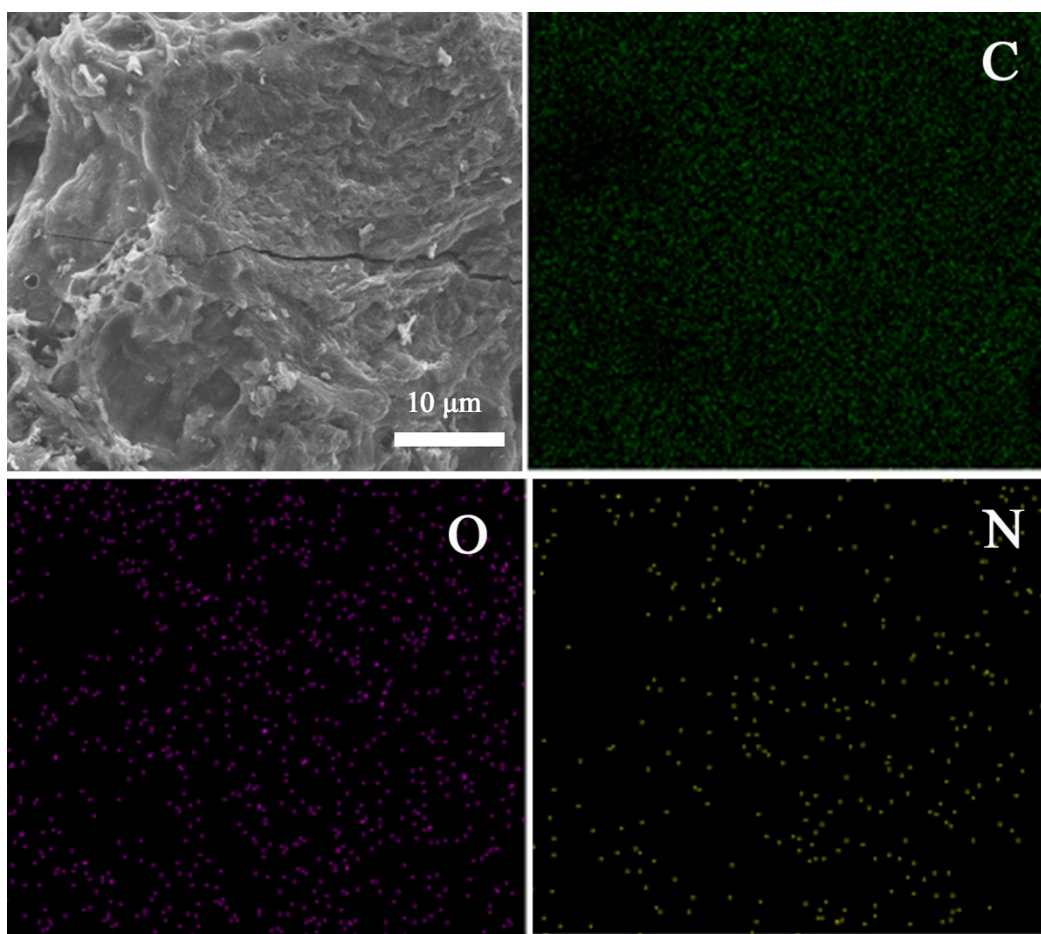

**Fig. S3** EDS mapping image of nitrogen-doped porous graphene/AC composite
